# Supplementary material
Source: Research Square preprint supplement (doi:10.21203/rs.3.rs-9132997/v1)

**Fig. 2a**

pAMPK

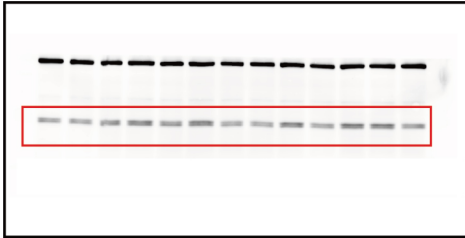

tAMPK

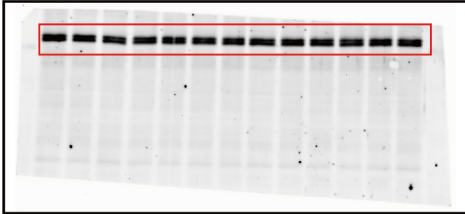

$\beta$ -Tubulin

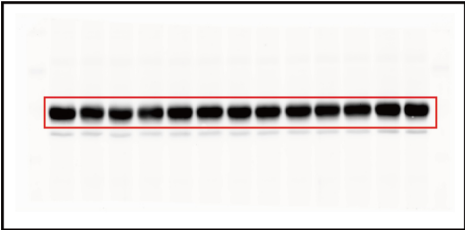

**Fig. 3c**

CaMKK

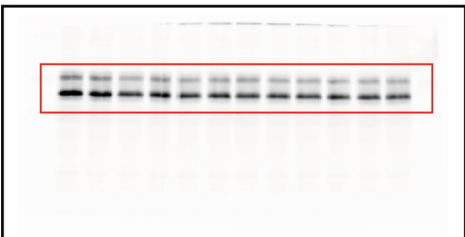

pAMPK

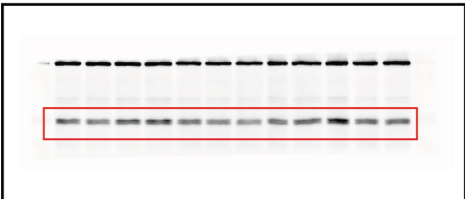

tAMPK

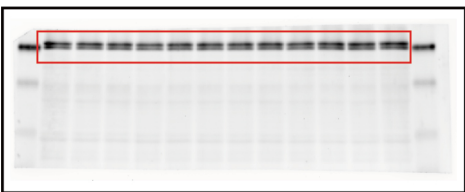

**Fig. 3e**

SIRT1

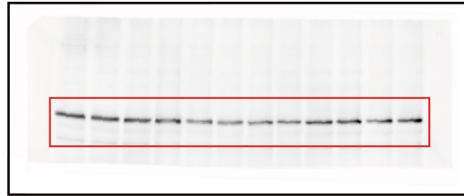

AcFOXO1

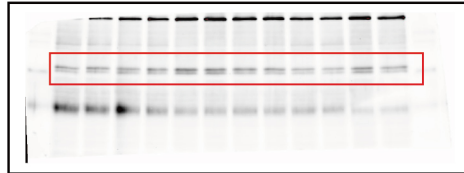

FOXO1

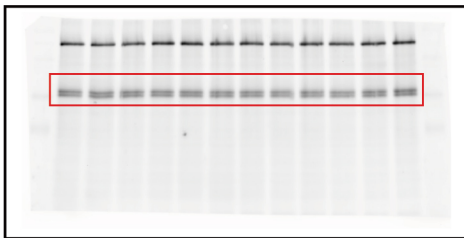

$\beta$ -Tubulin

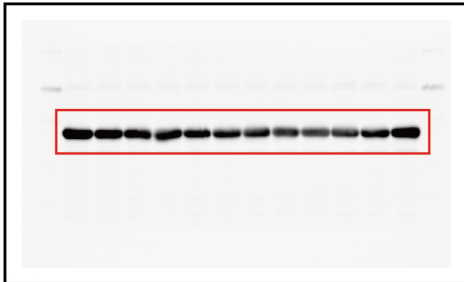

**Fig. 5b**

Cytochrome C

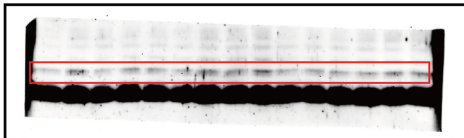

Caspase 3

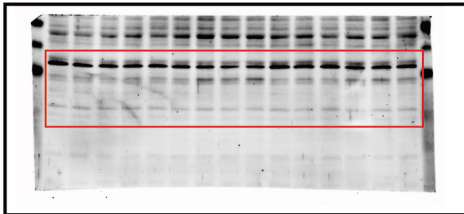

Caspase 9

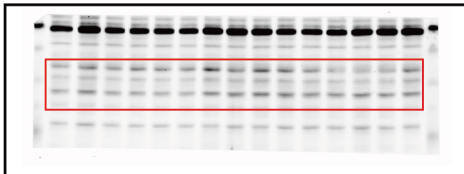

**Fig. 5b**

$\beta$ -Tubulin

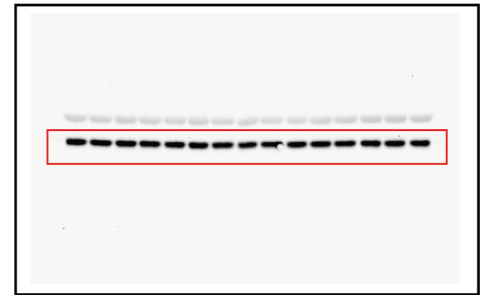

**Fig. 5f**

Cytochrome C

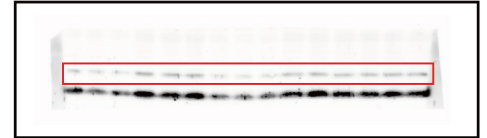

Caspase 3

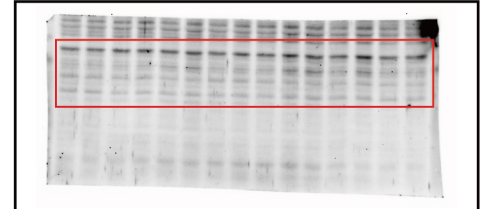

Caspase 9

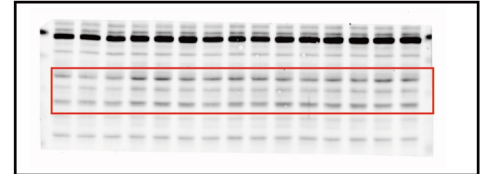

Supplement: Supplementary file 1 [file 242e026b505552244c8ac4e3.pdf]
